# Supplementary material for: Sources of Surface O 3 in the UK: Tagging O 3 within WRF-Chem
Source: Copernicus journal article supplement (doi:10.5194/acp-2022-173), 2022-03-25
Supplement: Supplementary file [file acp-2022-173-AC4-supplement.pdf]

## RESPONSE TO REVIEWER No1

For ‘Sources of Surface O<sub>3</sub> in the UK: Tagging O<sub>3</sub> within WRF-Chem’ by Johana Romero-Alvarez, Aurelia Lupaşcu, Douglas Lowe, Alba Badia, Scott Archer-Nicholls, Steve R. Dorling, Claire E. Reeves, and Tim Butler

*This paper describes a modeling study to investigate the sources of ozone over the UK in the spring-summer period in 2015 using a tagged approach. It is a competent study using an established technique, and while the results are not unexpected, they provide a valuable quantification of source contributions that constitute one of the first available in the literature. In particular, the study highlights the importance of sources outside the region in influencing ozone, and provides a thorough quantification of local and regional contributions across different parts of the UK. The finding that different measures would need to be taken to address ozone as represented by the MDA8 and AOT40 metrics is interesting, and this finding could be exploited better in the paper. It also feels as though model evaluation has been skipped over lightly, and inclusion of a brief assessment to convince the reader of the quality of the model simulations would strengthen the paper. Once these issues have been addressed, along with the points below, I feel that the manuscript would make a valuable addition to the literature and would be suitable for publication in ACP.*

We appreciate the reviewer’s positive assessment of the manuscript. Following the reviewer’s recommendation, we have addressed all the comments to further strengthen the paper. Changes to the manuscript have been highlighted in yellow.

### General Comments

*An original aspect of this study is consideration of impacts over different parts of the UK and using a number of different ozone metrics. Neither of these aspects is fully exploited in the results/discussion section, however. Which regions matter most from a population exposure perspective, for example? Which regions are currently close to regulatory limits? The exploration of different metrics is interesting, but how sensitive are the results likely to be to the meteorology in 2015? Sources in BEL/LUX/NET/GER may be more important than FRA in other years. Some consideration of these issues is needed.*

We have expanded the Results and Discussion section to include information about population exposure, regulatory limits, and dominant meteorology. The paragraphs below highlight the new information.

‘The mean contribution from the Eu super-region (FRA, GER, NET, LUX, BEL, NOS, Rest\_CEU and Rest\_Eu) accounts for nearly 16 % of the simulated monthly mean O<sub>3</sub>. The largest Eu super-region contributions are observed in the UK locations closer to the continental Europe and that together contain about 40% of UK population (East Anglia, London area, South-East England and Yorkshire)’

‘The LB is the principal contributor to the modelled mean O<sub>3</sub> mixing ratios in every receptor region. The contributions peak in May (mean absolute contribution 25 ppbv), reflecting the seasonal cycling in the northern hemispheric background O<sub>3</sub> (e.g., Monks, 2000; AQEG, 2009). Contributions from this source are more prominent in the regions located in the north, east, and north-west of the UK, e.g., Scotland (30 ppbv), Northern Ireland (28 ppbv), North-East (27 ppbv), the North-West, and Wales (26 ppbv). These regions contain about 20% of UK population and are primarily impacted by westerly flows and associated hemispheric O<sub>3</sub> background due to their geographical positions (AQEG, 2009). Also, they generally experience less than 10 days with O<sub>3</sub> concentrations above the EU limit of 120 µg m<sup>-3</sup> (DEFRA 2020) because of low NO<sub>x</sub> emissions locally’

‘The UK contributions are generally more significant in the east, south-east, and the Midlands, showing a maximum value in June and July in every receptor area, figures S.9 and S.10 in the Supplemental Material. The source region

provides up to 20% of the surface O<sub>3</sub> mixing ratios in East Anglia, 18% in the London area and East Midlands, and 16% in Yorkshire and the South East, making it the second-biggest source of O<sub>3</sub> in these locations after the LB. This area incorporates about 50% of UK population and often experiences more than 10 days with O<sub>3</sub> concentrations above the EU and UK threshold (concentration > 120 and 100 µg m<sup>-3</sup>) (DEFRA 2020).’

‘The summer months see an increase in the input from France, Germany and the Benelux region, in particular during anticyclonic weather conditions and over the receptor regions located in the south and east of the UK (e.g., South East England, East Anglia, the London area and the East Midlands). This is consistent with results of studies on extreme O<sub>3</sub> in the EU and the UK reporting an increase in surface O<sub>3</sub> concentrations under anticyclonic conditions (e.g., Pope et al. (2016); Ordóñez et al. (2016); Romero-Alvarez et al. (2022)). Romero-Alvarez et al. (2022), in particular, has shown that a wide area of high pressure centred over the Netherlands coast affected most of England during the first days of July 2015. During the same period, regions such as the East Anglia reported increases in O<sub>3</sub> mixing ratios of up to 16.6 ppbv h<sup>-1</sup> that overlapped with wind direction changes from south-southwest to south-southeast. Depending on the predominance of the wind direction (south- southeast and south-southwest), O<sub>3</sub> from anthropogenic sources within France can impact both the west and the east of the UK.’

‘The contribution is greater in the southern UK due to the proximity to the source region. The contributions from the Benelux region and Germany are more significant in the east of the UK due to the proximity with the continent and association with easterly flows (east and southeast) (about 14% and 6% of the Eu super-region in the East Anglia during the summer months comes from these two source regions, respectively).’

‘The mean contribution from each source region for the hours when the MDA8 O<sub>3</sub> exceeded 50 ppbv at each receptor area from May to August is presented in Fig. 10. The figure shows large contributions from source regions that were not seen as dominant sources. France, for example, becomes a major source, particularly in receptors in densely populated areas such as the south and east of the UK.’

‘Romero-Alvarez et al. (2022) has shown that MDA8 O<sub>3</sub> above 50 ppbv in the Southeast and East Anglia regions coincided in July 2015 with days when easterly winds prevailed (east-southeast flows). In contrast, MDA8 O<sub>3</sub> above 60 ppbv coincided with a shift in the wind direction from east-southeast to south-southeast and south and a sharp rise in the surface temperature.’

‘France was the most significant contributor to O<sub>3</sub> build-up when the mixing ratios exceeded the EU threshold in South East England (mean ~18 ppbv), East Anglia (mean ~21 ppbv), and the London area (mean ~26 ppbv) because convergence of westerly and south-easterly winds in the west of the UK diverted the contributions of domestic sources from these regions, as reported in Romero et al., (2022).’

‘In the South-East and the London area, the contributions from Rest\_Eu equal those from UK O<sub>3</sub>, while the influence is comparable to that from the west and Central Europe in the rest of the regions. As in the contributions to the MDA8 O<sub>3</sub> threshold of 50 ppbv above, the lateral boundary component remained nearly constant in all receptor areas with a

mean contribution about 12 ppbv. This is because most of the UK's weather was dominated by anticyclonic conditions.'

'When exceedances to the hourly surface O<sub>3</sub> mixing ratios above 40 ppbv is considered, the LB component becomes the dominant source in both receptor regions (estimated mean concentration between 21-24 ppbv) as its threshold is close to the tropospheric baseline ozone level associated with maritime North Atlantic air masses'

*Evaluation of the model simulation is consigned to the supplement, but I feel that something is needed in the paper to convince the reader that the model is up to the task, particularly given that "a good representation of O<sub>3</sub> in the European domain" is expressly stated in the conclusions. Please adapt the existing section 2.4 to provide a more quantitative summary of the model performance, particularly for O<sub>3</sub> and NO<sub>x</sub>.*

*It would also be useful to show a 4-month timeseries of ozone at least one location to demonstrate the seasonal and diurnal variability (this could be hourly ozone or alternatively daily MDA8). This is important to show the relative importance of episodes, which are investigated in the latter part of the study.*

We agree with the reviewer's remark and adapted section 2.4 to include a quantitative summary of the model performance for O<sub>3</sub> and NO<sub>x</sub>, see below. We also added 4-months' time series for a coastal site in East of England and two inland sites in south east of England.

'Table S.2 summarises the domain-wide statistical performance for NO, NO<sub>2</sub> and O<sub>3</sub>. The predicted temporal correlation coefficient ( $r$ ) for NO and NO<sub>2</sub> is fairly low (0.3), which is a feature exhibited also in other regional studies in Europe using WRF-Chem e.g., Tuccella et al. (2012), Pirovano et al. (2012) and Lupaşcu et al. (2022). The model underestimates NO mixing ratios in most analyzed sites with a domain-wide MB of -0.3 ppbv. NO<sub>2</sub> mixing ratios, on the other hand, are generally overestimated with a domain-wide MB of 0.31 ppbv, and no specific patterns distinguished in the bias distribution. This is consistent with the negative NO and positive NO<sub>2</sub> biases obtained across Europe using MOZART-4 chemistry reported in Mar et al. (2016).

The model's temporal variation in hourly O<sub>3</sub> concentrations at most sites is well represented, with an average  $r$  value of 0.6. The model tends to underestimate concentrations in most locations, with a domain-wide mean bias of -3.7 µg m<sup>-3</sup>. Correlation values above 0.5 are obtained in most sites, particularly in the UK, see Fig. S4a in the supplementary material. In contrast, low  $r$  values (~0.4) are concentrated on high-altitude sites, which might indicate difficulties in the model representing O<sub>3</sub> transport. This is in line with previous studies using MOZART-4 chemistry, such as Knote et al., (2014), showing low production of peroxyacetyl nitrates (PAN), an essential reservoir for NO<sub>2</sub> and a key player in remote O<sub>3</sub> production. Correlation values are consistent with summer time O<sub>3</sub> values below 0.40 reported on the WRF-Chem model evaluation over a European domain on Mar et al. (2016) using MOZART-4 chemistry.

Fig. 2 shows that the day-to-day variation in hourly O<sub>3</sub> mixing ratios is well represented by the model, except for large under-predictions during 1–3 July and 22-24 August, particularly at stations on the east coast, e.g., Weybourne. Note that the observed maximum hourly O<sub>3</sub> at this site is larger than those seen inland, e.g., Lillington Heath and Harwell (2015). This may indicate inflow of O<sub>3</sub> and precursors from nearby large metropolitan areas within the UK (e.g., London) or to longer-range transport from continental Europe. Thus, underestimation of O<sub>3</sub> during those days may be caused underestimation of long-range transport. This feature has also been identified in other source apportionment studies, such as Lupascu and Butler. (2019).'

*While the manuscript presents a case study from 2015, it would be valuable to speculate on how general the results are likely to be for other years.*

We agree with the reviewer's comment and added the following paragraph to the discussion:

'Notably, anticyclonic conditions in the UK have been associated with enhanced O<sub>3</sub> concentrations whereas cyclonic conditions and westerly winds have been linked to O<sub>3</sub> transport from the UK mainland and cleaner air from the North Atlantic (Jenkin et al., 2002; Pope et al., 2016; Romero-Alvarez et al., 2022). The contribution patterns described above may thus serve as predictors of future O<sub>3</sub> source apportionment over the UK regions.'

### **Specific Comments**

*Line 40: narrow concentration window: this might be rephrased, as three orders of magnitude isn't particularly narrow.*

We agree with the reviewer. The paragraph has been rephrased as follow:

'The production of O<sub>3</sub> in the troposphere is highly non-linear. It depends on the abundance of nitrogen oxides (NO<sub>x</sub> = NO<sub>2</sub> + NO) and peroxy radicals (HO<sub>2</sub>) generally produced after the oxidation of volatile organic compounds (VOCs) by hydroxyl radical (OH) (Monks, 2005). The reaction of NO with HO<sub>2</sub> and the subsequent photolysis of NO<sub>2</sub> generating O<sub>3</sub> is the primary known mechanism of O<sub>3</sub> production (Atkinson, 2000; Monks, 2005). NO<sub>x</sub> concentrations determine whether O<sub>3</sub> is produced or chemically removed (Monks, 2005). In the rural areas of most industrialized countries, where NO<sub>x</sub> is available at moderate levels, the rate of O<sub>3</sub> formation increases with increasing NO<sub>x</sub> concentrations (NO<sub>x</sub>-limited regime). In more polluted areas, by contrast, high NO<sub>x</sub> concentrations inhibit O<sub>3</sub> formation as this begins being depleted by NO (NO<sub>x</sub> titration effect). Subsequent formation of nitric acid (HNO<sub>3</sub>) from the reaction of NO<sub>2</sub> with OH constitutes a major endpoint for O<sub>3</sub> in such environments (Monks, 2005). However, elevated inputs of non-methane VOCs (NMVOCs) can increase the production of O<sub>3</sub> as the reaction of VOCs with OH radicals become more significant (NO<sub>x</sub>-saturated regime).'

*Line 49: "European" -> "UK and European"*

The line was updated accordingly

*Line 56: Reductions in European NO<sub>x</sub> emissions would be expected to give a reduction in rural ozone concentrations in the UK, as this is far from the source region.*

Thank you for this observation, the paragraph has been reworded as:

'Accordingly, increasing emissions of precursors in Asia and North America influence O<sub>3</sub> concentrations entering Europe from the North Atlantic, offsetting the effects of European regional emission reductions on O<sub>3</sub> (HTAP, 2010; Derwent et al., 2018).'

*Line 65: As stated, tagged-ozone methods are better than perturbation approaches for attribution studies quantifying the contribution of different sources at a given place/time. However, they are less well suited for quantifying the effect*

*of emission controls which involve changing sources (which is how this concept was introduced in line 60). Some rephrasing is needed to avoid undermining the approach adopted here.*

The paragraph was updated as follows:

‘S-R studies often compare model simulations that include all anthropogenic emissions with those obtained after modifying emissions from a region of interest (the so-called perturbation approach). However, as O<sub>3</sub> chemistry is highly non-linear, this approach can lead to unrealistic attribution estimates, e.g., Emmons et al. (2012) underestimated the O<sub>3</sub> contribution by up to a factor of 4 when perturbing NO emissions by 20%. Tagged-ozone methods, on the other hand, use additional diagnostics to follow the reaction of different emissions to the formation of O<sub>3</sub>, making the approach suited to investigate the contribution of different precursors to the total amount of O<sub>3</sub> (Emmons et al., 2012; Grewe et al., 2012; Butler et al., 2018).’

*Line 75: Is the tagged ozone mechanism used here existing or new? Please make any novel aspects of the current study clear.*

The tagged ozone mechanism is the same used on Lupaşcu and Butler, (2019). However, in our setup we reduced the number of European sources that are tracked, and we do not explicitly track the HTAP regions that act as a boundary in Lupaşcu and Butler (2019). The line has been updated accordingly:

‘The present study quantifies the contributions to surface O<sub>3</sub> in 12 receptor regions in the UK from anthropogenic NO<sub>x</sub> emissions from inside and outside the UK using the tagged-ozone method developed in Lupaşcu and Butler, (2019) with a reduced number of European source regions.’

*Line 107-8: It would be helpful to add a sentence here to suggest why nudging led to poorer simulations.*

We now give our interpretation of this effect in the paragraph, as follows:

‘This decision was made after a test analysis showed that nudging of winds above the planetary boundary layer (PBL) and temperature at all layers, as done in Mar et al. (2016), leads to a representation of hourly NO<sub>2</sub> and O<sub>3</sub> mixing ratios in East Anglia region (East of UK) that was inconsistent with observations. The nudging simulation predicted shallower boundary layers compare with that obtained using the re-starting method, particularly over the Norfolk Sea coast, leading to high concentrations of NO<sub>2</sub>, especially at night time, and larger O<sub>3</sub> lost due to increased deposition.’

*Line 126: "The method used here is based on...." Is the Lupaşcu and Butler approach used here directly or are there any developments or changes in implementation? It is important to be clear about the scientific contributions of the present study. Is any element of this new?*

The tagged ozone mechanism is the same used on Lupaşcu and Butler, (2019). However, in our setup we reduced the number of European sources that are tracked, and we do not explicitly track the HTAP regions that act as a boundary in Lupaşcu and Butler (2019). This is now clarified in the Methods section:

‘The method used here attributes of O<sub>3</sub> contributions exclusively to NO<sub>x</sub> precursors using tagged-ozone method developed in Lupaşcu and Butler, (2019).’

*Line 136: How important is reentry of ozone into the model domain likely to be?*

The regional model is not combined with the global model as these are working as offline systems and therefore there is no feedback between the wrf and global model.

*Line 151: This sentence does not describe how the contribution of tagged O<sub>3</sub> to AOT40 was calculated, it just describes how AOT40 is calculated.*

We agree with the reviewer and reworded the paragraph as follows:

‘The AOT40 is defined as the accumulated excess of hourly O<sub>3</sub> concentrations above 40 ppbv measured during daylight hours (between 08:00 and 20:00) Central European Time (CET) over a typical three-month growing season May-July. Here, contribution of concentration of tagged O<sub>3</sub> to the cumulative metric AOT40 was calculated by selecting the hours when O<sub>3</sub> mixing ratios exceeded the hourly 40 ppbv threshold between 08:00 and 20:00 central European time (CET) from May-July over the most relevant arable farming areas in the UK, East Anglia and the South East, see Eq. (1).’

*Line 156: Equation 1 is incorrect:  $\max(O_3-40, 0)$*

*Note that this is summed over specific hours, not all hours*

Equation has been corrected.

*Figures 7 and 8 show the same variable (O<sub>3</sub> chemical production) and it would be helpful to combine them so that they can be compared more easily.*

Figures 7 and 8 have been combined as suggested.

*Figures 9-12: It is not clear that all four figures are required; presenting results for two contrasting months would be sufficient, with the others placed in the supplement. Note that use of contrasting color palettes would allow the reader to separate the inset pie chart more easily, and that separating the legend into two sections would make interpretation of the charts easier.*

Figures 9-12 had been updated as suggested. We also moved Figs. 10 to 12 to the supplementary material.

*Figures 13-15 could also be presented a lot more clearly, ideally with the panels arranged in a more geographically-intuitive layout. Flipping x and y axes would make the figures easier to read (so key sectors LB and UK are first rather than bottom of the list), truncating the O<sub>3</sub> axis at 25 or 30 would make values more readable, and coloring bars consistent with Figs 9-12 would make contributions stand out better.*

Figures 13-15 had been updated.

### **Typos and minor issues**

*Line 88: is -> are*

The line was modified accordingly.

*Line 94: citation error "G. a."*

The line was corrected ‘Grell et al., 2005’.

*Line 100: citation format for Mar et al.*

The line was modified accordingly.

*Line 147: stablished (also exceeds -> exceed)*

The line was modified accordingly.

*Line 151: remove "concentration of"*

The line was modified as suggested.

*Line 169: units needed for the mean bias*

The line was changed accordingly ( $\mu\text{g m}^{-3}$ ).

*Line 201: remove "from"*

The line was modified accordingly.

*Line 260: Remove subsection, as there is no 3.1.2*

The section was divided into two subsections: 3.1.1 Spatial distribution and temporal variation and, 3.1.2 Regional dependence.

*Line 321: Units on ozone mixing ratios*

The line has been corrected.

*Line 385: positive and negative bias in what/where?*

These refer to  $\text{O}_3$  mean bias. This has been specified in the sentence.

*Line 506: The Romero-Alvarez reference is out of sequence*

The text has been corrected accordingly.

*The coastlines in Fig 1a are drawn at very low resolution, and the figure would look tidier if the resolution was improved. Consider adding the model grid to give the reader an indication of the model resolution.*

We have increased the resolution of the coast in the figure as suggested. However, we did not plot the model's grid cell to indicate the resolution as the tool we are using to create this plot do not support raster plots.

*Fig 6 caption: Closed up -> Close up*

The typo has been fixed.

*Data availability: key output data should be made available through a publicly accessible repository such as CEDA*

We will follow the Reviewer's suggestion and make the ascii files for the plots available on Zenodo.

*Author contributions: A clearer statement of author contributions in needed.*

We updated the authors contributions statement.

*Several entries in the reference list refer to discussion papers that are now published (e.g., Lupascu and Butler; Kuik et al.). Please update these.*

The references have been updated.

*Lines 798, 818: number not indicated in header, remove comment?*

We have removed the “number indicated in header” from Figures caption.

## **Supplement:**

*S1.1: Person -> Pearson*

The typo has been fixed.

*p.5: particularly -> particularly*

The typo has been fixed.

*p.6: Fig 5S-> Fig S5, Fig 4S -> Fig S4*

The typos have been fixed.

*Most of the figures in the supplement are not of publication quality, and the timeseries in particular need to larger and more clearly labelled so that the comparison of measured and observed concentrations is clearer. In the spatial maps (Figs S6-S8) the results would be much clearer if a more appropriate color scale was used for the difference plots (ideally dichromatic).*

We have updated the figures as suggested.

*I do not find the composition comparison very convincing. While the analysis points to a number of model weaknesses, the causes remain unclear, so the comparison does not lend confidence in the performance of the model. While derived metrics, particularly those based on thresholds, are challenging to match well, I would have expected diurnal variation in NO, NO2 and O3 to be represented better.*

We understand the reviewer’s concern. However, as pointed in Lupascu et al (2022) and the reference therein, several factors might be responsible for model performance, including relatively coarse resolution that increases diffusion into grid cells, and the errors associated with the wind speed and direction that can’t capture reasonably well the transport of pollutant from the source. Moreover, a common feature of the models is the overestimation of nighttime NOx concentration (Kuik et al., 2018, Im et al., 2015) due to reduced mixing at nighttime.

Lupaşcu, A., Otero, N., Minkos, A., and Butler, T.: Attribution of surface ozone to NOx and VOC sources during two different high ozone events, Atmos. Chem. Phys. Discuss. [preprint], <https://doi.org/10.5194/acp-2022-189>, in review, 2022.

Kuik, F., Kerschbaumer, A., Lauer, A., Lupascu, A., von Schneidmesser, E., and Butler, T. M.: Top-down quantification of NOx emissions from traffic in an urban area using a high-resolution regional atmospheric chemistry model, Atmos. Chem. Phys., 18, 8203–8225, <https://doi.org/10.5194/acp-18-8203-2018>, 2018.

Im, U., Bianconi, R., Solazzo, E., Kioutsioukis, I., Badia, A., Balzarini, A., Baró, R., Bellasio, R., Brunner, D., Chemel, C., Curci, G., Flemming, J., Forkel, R., Giordano, L., Jiménez-Guerrero, P., Hirtl, M., Hodzic, A., Honzak, L., Jorba, O., Knote, C., Kuenen, J. J., Makar, P. A., Manders-Groot, A., Neal, L., Pérez, J. L., Pirovano, G., Pouliot, G., Jose, R. S., Savage, N., Schroder, W., Sokhi, R. S., Syrakov, D., Torian, A., Tuccella, P., Werhahn, J., Wolke, R., Yahya, K., Zabkar, R., Zhang, Y., Zhang, J., Hogrefe, C., and Galmarini, S.: Evaluation of operational on-line-coupled regional air quality models over Europe and North America in the context of AQMEII phase 2. Part I: Ozone, Atmos. Environ., 115, 404–420, <https://doi.org/10.1016/j.atmosenv.2014.09.042>, 2015.
